# Supplementary material for: The Usefulness of Antigen Testing in Predicting Contagiousness in COVID-19
Source: PubMed Central journal article supplement (PMC9045251; doi:10.1128/spectrum.01962-21), 2022-03-29
Supplement: spectrum01962-21_supp_1_seq13.pdf [file spectrum01962-21_supp_1_seq13.pdf]

1 Manuscript: The usefulness of antigen testing in predicting contagiousness in COVID-19

2 Appendix Table (Supplements).

3 Table S1. Demographic characteristics of the population according to antigen tests result.

| Variable               |        | Antigen test (absolute frequency (%)) |                   | p-value          |
|------------------------|--------|---------------------------------------|-------------------|------------------|
|                        |        | Negative (n = 234)                    | Positive (n = 72) |                  |
| Sex                    | Female | 136 (58.1%)                           | 44 (61.1%)        | <b>0.652</b>     |
|                        | Male   | 98 (41.9%)                            | 28 (38.9%)        |                  |
| Age (years)*           |        | 37.0 [18.0, 84.0]                     | 45.5 [20.0, 96.0] | <b>0.001684</b>  |
| Cough                  | No     | 177 (75.6%)                           | 37 (51.4%)        | <b>8.691e-05</b> |
|                        | Yes    | 57 (24.4%)                            | 35 (48.6%)        |                  |
| Fever                  | No     | 207 (88.5%)                           | 45 (62.5%)        | <b>4.344e-07</b> |
|                        | Yes    | 27 (11.5%)                            | 27 (37.5%)        |                  |
| Odynophagia            | No     | 194 (82.9%)                           | 36 (50.0%)        | <b>1.594e-08</b> |
|                        | Yes    | 40 (17.1%)                            | 36 (50.0%)        |                  |
| Dyspnea                | No     | 211 (90.2%)                           | 50 (69.4%)        | <b>1.409e-05</b> |
|                        | Yes    | 23 (9.8%)                             | 22 (30.6%)        |                  |
| Fatigue                | No     | 179 (76.5%)                           | 29 (40.3%)        | <b>8.417e-09</b> |
|                        | Yes    | 55 (23.5%)                            | 43 (59.7%)        |                  |
| Rhinorrhea             | No     | 209 (89.3%)                           | 58 (80.6%)        | <b>0.05126</b>   |
|                        | Yes    | 25 (10.7%)                            | 14 (19.4%)        |                  |
| Conjunctivitis**       | No     | 232 (99.1%)                           | 67 (93.1%)        | <b>0.009017</b>  |
|                        | Yes    | 2 (0.9%)                              | 5 (6.9%)          |                  |
| Headache               | No     | 178 (76.1%)                           | 33 (45.8%)        | <b>1.242e-06</b> |
|                        | Yes    | 56 (23.9%)                            | 39 (54.2%)        |                  |
| Diarrhea               | No     | 216 (92.3%)                           | 63 (87.5%)        | <b>0.2085</b>    |
|                        | Yes    | 18 (7.7%)                             | 9 (12.5%)         |                  |
| Anosmia and/or ageusia | No     | 212 (90.6%)                           | 46 (63.9%)        | <b>5.047e-08</b> |
|                        | Yes    | 22 (9.4%)                             | 26 (36.1%)        |                  |

4 \* Median (range) \*\* Fisher test

5

6

7 **Table S2. Demographic characteristics of the population according to antigen tests result.**

| Variable                      |               | Viral culture (absolute frequency (%)) |                   | p value          |
|-------------------------------|---------------|----------------------------------------|-------------------|------------------|
|                               |               | Negative (n = 253)                     | Positive (n = 53) |                  |
| <b>Sex</b>                    | <b>Female</b> | 149 (58.9%)                            | 31.0 (58.5%)      | <b>0.9568</b>    |
|                               | <b>Male</b>   | 104 (41.1%)                            | 22.0 (41.5%)      |                  |
| <b>Age (years)*</b>           |               | 38.0 [18.0, 86.0]                      | 44.0 [20.0, 96.0] | <b>0.06841</b>   |
| <b>Cough</b>                  | <b>No</b>     | 187 (73.9%)                            | 27 (50.9%)        | <b>0.0009</b>    |
|                               | <b>Si</b>     | 66 (26.1%)                             | 26 (49.1%)        |                  |
| <b>Fever</b>                  | <b>No</b>     | 221 (87.4%)                            | 31 (58.5%)        | <b>5.398e-07</b> |
|                               | <b>Si</b>     | 32 (12.6%)                             | 22 (41.5%)        |                  |
| <b>Odynophagia</b>            | <b>No</b>     | 205 (81.0%)                            | 25 (47.2%)        | <b>2.133e-07</b> |
|                               | <b>Si</b>     | 48 (19.0%)                             | 28 (52.8%)        |                  |
| <b>Dyspnea</b>                | <b>No</b>     | 227 (89.7%)                            | 34 (64.2%)        | <b>1.755e-06</b> |
|                               | <b>Si</b>     | 26 (10.3%)                             | 19 (35.8%)        |                  |
| <b>Fatigue</b>                | <b>No</b>     | 188 (74.3%)                            | 20 (37.7%)        | <b>2.116e-07</b> |
|                               | <b>Si</b>     | 65.0 (25.7%)                           | 33 (62.3%)        |                  |
| <b>Rhinorrhea</b>             | <b>No</b>     | 224 (88.5%)                            | 43 (81.1%)        | <b>0.1416</b>    |
|                               | <b>Si</b>     | 29 (11.5%)                             | 10 (18.9%)        |                  |
| <b>Conjunctivitis**</b>       | <b>No</b>     | 249 (98.4%)                            | 50 (94.3%)        | <b>0.1028</b>    |
|                               | <b>Si</b>     | 4 (1.6%)                               | 3 (5.7%)          |                  |
| <b>Headache</b>               | <b>No</b>     | 188 (74.3%)                            | 23 (43.4%)        | <b>9.749e-06</b> |
|                               | <b>Si</b>     | 65 (25.7%)                             | 30 (56.6%)        |                  |
| <b>Diarrhea</b>               | <b>No</b>     | 233 (92.1%)                            | 46 (86.8%)        | <b>0.2827</b>    |
|                               | <b>Si</b>     | 20 (7.9%)                              | 7 (13.2%)         |                  |
| <b>Anosmia and/or ageusia</b> | <b>No</b>     | 221 (87.4%)                            | 37 (69.8%)        | <b>0.0014</b>    |
|                               | <b>Yes</b>    | 32.0 (12.6%)                           | 16.0 (30.2%)      |                  |

\* Median (range) \*\* Fisher test

8  
9  
10  
11  
12  
13

14 **Table S3. Logistic regression for the prediction of contagiousness during COVID-19**

|                                    |                         | Coefficient | Crude OR<br>(CI95%)        | Adjusted OR<br>(CI95%)    | p-value |
|------------------------------------|-------------------------|-------------|----------------------------|---------------------------|---------|
|                                    | <b>(Intercept)</b>      | -18.56      |                            |                           |         |
| <b>Ct value</b>                    | <b>≥ 20</b>             | REF         |                            |                           |         |
|                                    | <b>≥ 15 and &lt; 20</b> | 3.22        | 68.83<br>(13.95,339.55)    | 25.07 (2.27,277.23)       | 0.009   |
|                                    | <b>&lt; 15</b>          | 5.67        | 1091.5<br>(148.57,8018.91) | 290.45<br>(17.19,4907.16) | < 0.001 |
| <b>Antigen test</b>                | <b>Negative</b>         | REF         |                            |                           |         |
|                                    | <b>Positive</b>         | 1.75        | 134.79<br>(30.45,596.64)   | 5.79 (0.5,66.85)          | 0.16    |
| <b>RT-PCR</b>                      | <b>Negative</b>         | REF         |                            |                           |         |
|                                    | <b>Positive</b>         | 14.34       | 6744082.23 (0,Inf)         | 1700015.17 (0,Inf)        | 0.995   |
| <b>Days from onset of symptoms</b> | <b>Asymptomatic</b>     | REF         |                            |                           |         |
|                                    | <b>1 – 5</b>            | -0.38       | 8.6 (3.11,23.84)           | 0.68 (0.06,7.39)          | 0.75    |
|                                    | <b>6 – 11</b>           | -1.55       | 3.55 (1.13,11.19)          | 0.21 (0.02,2.74)          | 0.234   |
|                                    | <b>&gt; 11</b>          | -16.65      | 0 (0,Inf)                  | 0 (0,Inf)                 | 0.993   |
| <b>Cough</b>                       | <b>No</b>               | REF         |                            |                           |         |
|                                    | <b>Yes</b>              | 0.12        | 1.74 (0.91,3.32)           | 1.14 (0.22,5.93)          | 0.88    |
| <b>Fever</b>                       | <b>No</b>               | REF         |                            |                           |         |
|                                    | <b>Yes</b>              | 0.81        | 3.19 (1.58,6.45)           | 2.26 (0.39,13.26)         | 0.365   |
| <b>Odynophagia</b>                 | <b>No</b>               | REF         |                            |                           |         |
|                                    | <b>Yes</b>              | -0.05       | 3.65 (1.86,7.15)           | 0.94 (0.18,5)             | 0.946   |
| <b>Dyspnea</b>                     | <b>No</b>               | REF         |                            |                           |         |
|                                    | <b>Yes</b>              | 1.10        | 3.13 (1.5,6.53)            | 3.02 (0.55,16.46)         | 0.202   |
| <b>Fatigue</b>                     | <b>No</b>               | REF         |                            |                           |         |
|                                    | <b>Yes</b>              | -0.09       | 3.08 (1.59,5.97)           | 0.91 (0.13,6.21)          | 0.924   |
| <b>Headache</b>                    | <b>No</b>               | REF         |                            |                           |         |
|                                    | <b>Yes</b>              | 0.10        | 2.61 (1.36,5.01)           | 1.11 (0.21,5.74)          | 0.904   |
| <b>Anosmia and/or ageusia</b>      | <b>No</b>               | REF         |                            |                           |         |
|                                    | <b>Yes</b>              | -0.47       | 1.47 (0.72,3)              | 0.62 (0.12,3.09)          | 0.56    |
